# Supplementary material for: Exploring the anticancer potential of Vitex negundo L.: Cytotoxicity and gene regulation in PA1 ovarian cancer cells
Source: Research Square preprint supplement (doi:10.21203/rs.3.rs-5945864/v1), 2025-02-05
Supplement: Supplementary file 1 [file a759b54b0e4925e838501d66.docx]

**Suppl. Table 1.** Inhibition (%) of ovarian cancer cell line PA1 treated with *Vitex negundo* ethanolicextract

| Con. (μg/ml) | Inhibition (%) | | |
| --- | --- | --- | --- |
| Control | 0.22 | 0.03 | 0 |
| 10 | 10.24 | 6.72 | 11.82 |
| 20 | 20.75 | 17.46 | 19.53 |
| 30 | 27.81 | 26.8 | 31.62 |
| 40 | 37.24 | 34.86 | 37.73 |
| 50 | 47.66 | 48.77 | 50.49 |
| 60 | 51.78 | 52.23 | 53.01 |
| 70 | 56.80 | 57.84 | 59.28 |
| 80 | 62.65 | 65.72 | 66.53 |
| 90 | 69.44 | 70.81 | 71.25 |
| 100 | 78.87 | 77.37 | 74.39 |

**Suppl. Table 2.** mRNA Expression profiling for the candidate targets which are up & downregulated upon treatment using RT PCR

| **Housekeeping Gene - ACT** | | | | |  | | **Gene of Interest - STIP1** | | | | | | | | |
| --- | --- | --- | --- | --- | --- | --- | --- | --- | --- | --- | --- | --- | --- | --- | --- |
| **Sample** | **ct1** | **ct2** | **Avg ct** |  | | **Sample** | | **ct1** | **ct2** | **Avg ct** | **Δ ct** | **ΔΔ ct** | **2^-ΔΔct** | **Control** |
| **Control** | 27.63 | 27.64 | 27.64 |  | | **Control** | | 34.52 | 34.49 | 34.51 | 6.87 | 0.00 | 1.00 | 1.00 |
|  |  |  |  |  | |  | |  |  |  |  |  |  | **Treated** |
| **Treated** | 26.72 | 26.89 | 26.81 |  | | **Treated** | | 28.32 | 28.36 | 28.34 | 1.54 | -5.34 | 40.36 | **40.36** |
|  |  |  |  |  | |  | |  |  |  | **Avg Δ ct** | 6.87 |  |  |

| **Housekeeping Gene - ACT** | | | |  | **Gene of Interest - PLEKHH3** | | | | | | | |
| --- | --- | --- | --- | --- | --- | --- | --- | --- | --- | --- | --- | --- |
| **Sample** | **ct1** | **ct2** | **Avg ct** |  | **Sample** | **ct1** | **ct2** | **Avg ct** | **Δ ct** | **ΔΔ ct** | **2^-ΔΔct** | **Control** | |
| **Control** | 27.63 | 27.64 | 27.64 |  | **Control** | 29.45 | 29.43 | 29.44 | 1.81 | 0.00 | 1.00 | 1.00 | |
|  |  |  |  |  |  |  |  |  |  |  |  | **Treated** | |
| **Treated** | 26.72 | 26.89 | 26.81 |  | **Treated** | 34.49 | 35.02 | 34.76 | 7.95 | 6.15 | 0.01 | **0.014** | |
|  |  |  |  |  |  |  |  |  | **Avg Δ ct** | 1.81 |  |  | |

| **Housekeeping Gene - ACT** | | | |  | **Gene of Interest - ATP5F1A** | | | | | | | |
| --- | --- | --- | --- | --- | --- | --- | --- | --- | --- | --- | --- | --- |
| **Sample** | **ct1** | **ct2** | **Avg ct** |  | **Sample** | **ct1** | **ct2** | **Avg ct** | **Δ ct** | **ΔΔ ct** | **2^-ΔΔct** | **Control** |
| **Control** | 27.63 | 27.64 | 27.64 |  | **Control** | 29.72 | 29.68 | 29.70 | 2.07 | 0.00 | 1.00 | 1.00 |
|  |  |  |  |  |  |  |  |  |  |  |  | **Treated** |
| **Treated** | 26.72 | 26.89 | 26.81 |  | **Treated** | 36.28 | 36.36 | 36.32 | 9.52 | 7.45 | 0.01 | **0.006** |
|  |  |  |  |  |  |  |  |  | **Avg Δ ct** | 2.07 |  |  |
